# Supplementary material
Source: PubMed Central journal article supplement (PMC4081343)
Supplement: supp_pp.114.242404_242404supp.pdf [file supp_pp.114.242404_242404supp.pdf]

## Supplemental data

**Table S1.** Modulation of morphological phenotypes by *AtZAT6* expression. The rosette leaf numbers were assayed from 30-d-old plants, and the other data were assayed from 70-d-old plants.  $n = 15$ . Means  $\pm$  SD are shown in the results, and asterisk symbols (\*) indicates the significant difference of  $p < 0.05$  compared to WT.

**Table S2.** Primers used for vector construction.

**Table S3.** Primers used for quantitative real-time PCR.

**Fig. S1.** Expression level changes of *AtZAT6* under abiotic and biotic stress conditions. Arabidopsis eFP Browser (<http://bar.utoronto.ca/efp/cgi-bin/efpWeb.cgi>) was used for characterization of *AtZAT6* gene expression.

**Fig. S2.** Transactivation activity of *AtZAT6* in yeast. The plasmids of *AtZAT6*-pGBKT7, pCL-1-pGBKT7, pGBKT7 were transformed into the yeast strain AH109, and the transformants were then plated on selective SD medium [SD medium lacking Trp, SD medium lacking Trp, Ade and His with 10 mM 3-amino-1,2,4-triazole (3-AT)] and grown for 2 d at 30 ° C. The pCL-1-pGBKT7 and the empty vector pGBKT7 were used as positive and negative controls, respectively.

**Fig. S3.** Phenotypes of 21-d-old WT and *AtZAT6* overexpressing T<sub>1</sub> generation plants. Top, 21-d-old WT and *AtZAT6* overexpressing T<sub>1</sub> generation plants in soil. Bottom, the relative mRNA level of *AtZAT6* of the above plants. The expression level of *AtZAT6* in WT was normalized as 1.0. Means  $\pm$  SDs of three independent experiments are shown in the results,

and asterisk symbols (\*) indicates the significant difference of  $p < 0.05$  compared to WT.

**Fig. S4.** The expression level of *AtZAT6* in *AtZAT6* knockdown plants. The expression level of *AtZAT6* in WT was normalized as 1.0. Means  $\pm$  SDs of three independent experiments are shown in the results, and asterisk symbols (\*) indicates the significant difference of  $p < 0.05$  compared to WT.

**Fig. S5.** Phenotypes of 7-d-old WT and *AtZAT6* overexpressing plants on MS plate. (A)(B) 7-d-old WT and *AtZAT6* overexpressing plants on MS plate. Bars = 0.5 cm. (C) Primary root length of 7-d-old WT and *AtZAT6* overexpressing plants on MS plate. Means  $\pm$  SDs (n = 30) are shown in the results, and asterisk symbols (\*) indicates the significant difference of  $p < 0.05$  compared to WT.

**Fig. S6.** Modulation of *AtZAT6* expression affects glutathione pool and redox state. (A)-(C) Quantifications of GSH (A), GSSG (B) and GSH redox state (C). Means  $\pm$  SDs of three independent experiments are shown in the results, and asterisk symbols (\*) indicates the significant difference of  $p < 0.05$  compared to WT.

**Fig. S7.** Phenotype of *35S::GFP-ZAT6* transgenic plants. (A)(B) 28-d-old of WT and *35S::GFP-ZAT6* transgenic plants in MS plate (A) and in soil (B). Bars = 1 cm. (C) *AtZAT6* expression levels in WT and *35S::GFP-ZAT6* transgenic plants by real-time PCR. The expression level of *AtZAT6* in WT was normalized as 1.0. (D) Growth of *Pst* DC3000 and *Pst* DC3000(*avrRpt2*) on WT and *35S::GFP-ZAT6* transgenic plants at 0 and 3 dpi of bacterial infection, respectively. Means  $\pm$  SDs of three independent experiments are shown in the results, and asterisk symbols (\*) indicates the significant difference of  $p < 0.05$  compared to

WT.

**Table S1.** Modulation of morphological phenotypes by *AtZAT6* expression.

| <b>Morphology</b>   | <b>WT (Col-0)</b> | <b>35S::<i>ZAT6-3</i></b> | <b>35S::<i>ZAT6-6</i></b> | <b>35S::<i>ZAT6-8</i></b> | <b>amiR-6</b> | <b>amiR-10</b> |
|---------------------|-------------------|---------------------------|---------------------------|---------------------------|---------------|----------------|
| Rosette leaf number | 11.13 ± 0.90      | 11.47 ± 1.11              | 14.17 ± 1.05*             | 14.93 ± 1.60*             | 10.93 ± 1.23  | 11.20 ± 1.37   |
| Leaf length (cm)    | 2.39 ± 0.18       | 2.27 ± 0.11               | 1.54 ± 0.23*              | 1.38 ± 0.20*              | 2.42 ± 0.14   | 2.38 ± 0.09    |
| Leaf width (cm)     | 1.42 ± 0.16       | 1.39 ± 0.15               | 0.90 ± 0.16*              | 0.85 ± 0.16*              | 1.45 ± 0.13   | 1.43 ± 0.11    |
| Plant height (cm)   | 30.91 ± 3.80      | 28.77 ± 3.45              | 16.47 ± 3.52*             | 14.66 ± 2.62*             | 31.18 ± 3.47  | 31.75 ± 3.65   |
| Silique length (cm) | 1.42 ± 0.08       | 1.41 ± 0.08               | 1.21 ± 0.11*              | 1.12 ± 0.08*              | 1.42 ± 0.10   | 1.40 ± 0.09    |
| Sepal length (mm)   | 2.02 ± 0.14       | 2.03 ± 0.15               | 1.63 ± 0.17*              | 1.51 ± 0.18*              | 2.01 ± 0.08   | 1.99 ± 0.12    |
| Petal length (mm)   | 3.19 ± 0.14       | 3.26 ± 0.14               | 2.77 ± 0.17*              | 2.81 ± 0.16*              | 3.10 ± 0.17   | 3.13 ± 0.12    |
| Stamen length (mm)  | 2.47 ± 0.15       | 2.46 ± 0.11               | 2.09 ± 0.12*              | 2.01 ± 0.14*              | 2.43 ± 0.11   | 2.48 ± 0.12    |
| Carpel length (mm)  | 2.79 ± 0.14       | 2.73 ± 0.12               | 2.47 ± 0.16*              | 2.42 ± 0.11*              | 2.73 ± 0.13   | 2.77 ± 0.18    |

The rosette leaf numbers were assayed from 30-d-old plants, and the other data were assayed from 70-d-old plants. n = 15. Means ± SD are shown in the results, and asterisk symbols (\*) indicates the significant difference of  $p < 0.05$  compared to WT.

**Table S2.** Primers used for vector construction.

| <b>Gene</b> | <b>Primer</b>   | <b>Sequence</b>                                                 | <b>Specificity</b>                                                               |
|-------------|-----------------|-----------------------------------------------------------------|----------------------------------------------------------------------------------|
|             | ZAT6OXF         | 5'-TCCCCCGGGATGGCACTTGAAACTCTTAC-3'                             | ZAT6-pBIM and 35S::EGFP-AtZAT6<br>vector construction                            |
|             | ZAT6OXR         | 5'-CCGCTCGAGTTAGGGTTTCTCCGGGAAGT-3'                             |                                                                                  |
|             | ProZAT6F        | 5'-ACGCGTCGACGGAAC TAACAATATGATCAA-3'                           | ProZAT6-pBI101.2 vector construction                                             |
|             | ProZAT6R        | 5'-CGGGATCCTATCTTGAAGACTAGCTACT-3'                              |                                                                                  |
|             | ZAT6I           | 5'-gaTAAACGTGCGACTTCACGCTTtctctcttttgattcc-3'                   | amiR-ZAT6-pBARN vector construction                                              |
| ZAT6        | ZAT6II          | 5'-gaAAGCGTGAAGTCGCACGTTTAtcaaagagaatcaatga-3'                  |                                                                                  |
|             | ZAT6III         | 5'-gaAAACGTGAAGTCGGACGTTTTtcacaggtcgatgatg-3'                   |                                                                                  |
|             | ZAT6IV          | 5'-gaAAAACGTCCGACTTCACGTTTtctacatatattct-3'                     |                                                                                  |
|             | A               | 5'-TCATTTCAATTTGGAGAGCCCCTGCAAGGCGATTAAGTTGGGTAAC-3'            | ZAT6-pGBKT7 vector construction                                                  |
|             | B               | 5'-AGGATCCGATTCGTACACCCGCGGATAACAATTTACACACAGGAAACAG-3'         |                                                                                  |
|             | ZAT6F           | 5'-CGGGATCCGAATGGCACTTGAAACTCTTAC-3'                            | ZAT6-pGBKT7 vector construction                                                  |
|             | ZAT6R           | 5'-AACTGCAGTTAGGGTTTCTCCGGGAAGT-3'                              |                                                                                  |
|             | mini35SF        | 5'-GGAAGCTTGATATCTCCACTGACGTAAGGG-3'                            | mini35S-pCAMBIA1391Z and<br>4×TACAAT-mini35S-pCAMBIA1391Z<br>vector construction |
| mini35S     | mini35SR        | 5'-CAGGATCCCGTGTTCTCTCCAAATGAAATG-3'                            |                                                                                  |
|             | TACAAT-mini35SF | 5'-GGAAGCTTTACAATTACAATTACAATTACAATGATATCTCCACTGACGTAAGGG-3'    |                                                                                  |
|             | TAAAAT-mini35SF | 5'-GGAAGCTTTAAAATTTAAAATTTAAAATTTAAAATGATATCTCCACTGACGTAAGGG-3' |                                                                                  |

**Table S3.** Primers used for quantitative real-time PCR.

| <b>Gene</b>   | <b>Locus</b> | <b>Primer</b>      | <b>Sequence</b>               |
|---------------|--------------|--------------------|-------------------------------|
| <i>UBQ10</i>  | At4g05320    | UBQ10F             | 5'-TCCGGATCAGCAGAGGCTTA-3'    |
|               |              | UBQ10R             | 5'-TCAGAACTCTCCACCTCAAG-3'    |
| <i>ZAT6</i>   | At5g04340    | ZAT6F              | 5'-AAACCGTGACCTTGACCTGC-3'    |
|               |              | ZAT6R              | 5'-CTCCGTTCTTTCTTCGTAGTG-3'   |
| <i>EDS1</i>   | At3g48090    | EDS1F              | 5'-TGGAGGGTTCAACGTTTAGAAAG-3' |
|               |              | EDS1R              | 5'-CAGAGGAGAATGCGATTTGTGA-3'  |
| <i>PAD4</i>   | At3g52430    | PAD4F              | 5'-TCTCCATCCACGACCTCGTT-3'    |
|               |              | PAD4R              | 5'-AGTAAGTTCCAAAGGGCCAGAAT-3' |
| <i>PR1</i>    | At2g14610    | PR1F               | 5'-ATGAATTTTACTGGCTATTC-3'    |
|               |              | PR1R               | 5'-AACCCACATGTTACGGCGGA-3'    |
| <i>PR2</i>    | At3g57260    | PR2F               | 5'-CGATACCTTGCCAAGTCCAT-3'    |
|               |              | PR2R               | 5'-TGTACCGGAATCTGACACCA-3'    |
| <i>PR3</i>    | At3g12500    | PR3F               | 5'-ATGAAGATCAGACTTAGCATAAC-3' |
|               |              | PR3R               | 5'-AGCTCATTGCCACAGTCGAC-3'    |
| <i>PR4</i>    | At3g04720    | PR4F               | 5'-AGTGATCAAACAGAGGAACC-3'    |
|               |              | PR4R               | 5'-TCTGAAACAGCCGACTCTTC-3'    |
| <i>PR5</i>    | At1g75040    | PR5F               | 5'-CGTACAGGCTGCAACTTTGA-3'    |
|               |              | PR5R               | 5'-GCGTTGAGGTCAGAGACACA-3'    |
| <i>ACTIN2</i> | At3g18780    | Promoter-ACTIN2F   | 5'-TAGTTAACACGAGGGAAAAGGCT-3' |
|               |              | Promoter-ACTIN2R   | 5'-AAAGTGAGGAGGACAACGAGACA-3' |
| <i>EDS1</i>   | At3g48090    | Promoter-EDS1F     | 5'-GTTTATCAGATTCCACGTA-3'     |
|               |              | Promoter-EDS1R     | 5'-GTCTTGGTTCTATCAGCA-3'      |
| <i>PAD4</i>   | At3g52430    | Promoter-PAD4F     | 5'-AATGGACCTACCTTTCAC-3'      |
|               |              | Promoter-PAD4R     | 5'-TGTATCTTCTTGGCTTGT-3'      |
| <i>PR1</i>    | At2g14610    | Promoter-PR1 I-F   | 5'-TTGCTTCATCAATCTTAG-3'      |
|               |              | Promoter-PR1 I-R   | 5'-TACATTAGGTAAACAACG-3'      |
| <i>PR1</i>    | At2g14610    | Promoter-PR1 II-F  | 5'-CTGCGTATTAGTGTTTGG-3'      |
|               |              | Promoter-PR1 II-R  | 5'-AAATCGTATCGGACAGTT-3'      |
| <i>PR1</i>    | At2g14610    | Promoter-PR1 III-F | 5'-CAAACGTCCGATACGAT-3'       |
|               |              | Promoter-PR1 III-R | 5'-ATCTTGTCCCTTACACACATT-3'   |
| <i>PR2</i>    | At3g57260    | Promoter-PR2-F     | 5'-TTCTATCAAGGGAATGGTA-3'     |
|               |              | Promoter-PR2-R     | 5'-TACACACGACTTCAGTTT-3'      |
| <i>PR3</i>    | At3g12500    | Promoter-PR3-F     | 5'-TGCTTCAGTTTAGGAAAT-3'      |
|               |              | Promoter-PR3-R     | 5'-CTGCGTGCTATTCTTATG-3'      |

|               |           |                     |                                 |
|---------------|-----------|---------------------|---------------------------------|
| <i>PR4</i>    | At3g04720 | Promoter-PR4-F      | 5'-ACTTCAGCACTCCAATTC-3'        |
|               |           | Promoter-PR4-R      | 5'-TTTCTTGTGATTCTACGC-3'        |
| <i>PR5</i>    | At1g75040 | Promoter-PR5 I-F    | 5'-CGTTCAAGTAGCAAATCAGG-3'      |
|               |           | Promoter-PR5 I-R    | 5'-TGTTGTGAGGTGCGAGTT-3'        |
| <i>PR5</i>    | At1g75040 | Promoter-PR5 II-F   | 5'-TGCACTAATCACTCCGTTTC-3'      |
|               |           | Promoter-PR5 II-R   | 5'-GTACGTAAATGGTATCGTTATGTAG-3' |
| <i>PR5</i>    | At1g75040 | Promoter-PR5 III-F  | 5'-AGTCCATCTTCTTCTCTCTGT-3'     |
|               |           | Promoter-PR5 III-R  | 5'-ACCTGTCTGTGGCTTTG-3'         |
| <i>PR5</i>    | At1g75040 | Promoter-PR5 IV-F   | 5'-AGGTGTATTATATTAGAATTAGAAT-3' |
|               |           | Promoter-PR5 IV-R   | 5'-ATGGTCCACACGGTTTCG-3'        |
| <i>CBF1</i>   | At4g25490 | CBF1F               | 5'-AACTTCGCTGACTCGGCTTGG-3'     |
|               |           | CBF1R               | 5'-AACAGACGGCGGGTAAA-3'         |
| <i>CBF2</i>   | At4g25470 | CBF2F               | 5'-CGGTGATTACAGTCCGAAGC-3'      |
|               |           | CBF2R               | 5'-CAAGCCGAGTCAGCGAAA-3'        |
| <i>CBF3</i>   | At4g25480 | CBF3F               | 5'-CGGTAAGTGGGTTTGTGA-3'        |
|               |           | CBF3R               | 5'-GTTCCGCCGTGAAATAG-3'         |
| <i>CBF4</i>   | At5g51990 | CBF4F               | 5'-AAACGAGCTGGGAGGAAGAA-3'      |
|               |           | CBF4R               | 5'-AAGCAGAGCGACCACGAAGA-3'      |
| <i>DREB2A</i> | At5g05410 | DREB2AF             | 5'-AAAGGTAAAGGAGGACCAGA-3'      |
|               |           | DREB2AR             | 5'-GCCAAAGGACCATACATAGC-3'      |
| <i>DREB2B</i> | At3g11020 | DREB2BF             | 5'-GTATGAAGGGTAAAGGAGGA-3'      |
|               |           | DREB2BR             | 5'-CTGAGGGAAGTTAAGACGAG-3'      |
| <i>CBF1</i>   | At4g25490 | Promoter-CBF1 I-F   | 5'-TTGTTTTGCAGTAAATTAGG-3'      |
|               |           | Promoter-CBF1 I-R   | 5'-ATTCATGCTTTCGTGGAT-3'        |
| <i>CBF1</i>   | At4g25490 | Promoter-CBF1 II-F  | 5'-GATTCGATGAAACATATG-3'        |
|               |           | Promoter-CBF1 II-R  | 5'-CTTGAAAGCAACTACTAAA-3'       |
| <i>CBF1</i>   | At4g25490 | Promoter-CBF1 III-F | 5'-TGCATATCTTATTGTGAA-3'        |
|               |           | Promoter-CBF1 III-R | 5'-ATAGCAAGTTATCTTGAA-3'        |
| <i>CBF2</i>   | At4g25470 | Promoter-CBF2-F     | 5'-ATGGTTGTCTGACCCTAT-3'        |
|               |           | Promoter-CBF2-R     | 5'-AAGTTTCTGACCCTCAC-3'         |
| <i>CBF3</i>   | At4g25480 | Promoter-CBF3 I-F   | 5'-CCACAAAACCTGCATTAC-3'        |
|               |           | Promoter-CBF3 I-R   | 5'-GTTGCTAGATTCGAGACG-3'        |
| <i>CBF3</i>   | At4g25480 | Promoter-CBF3 II-F  | 5'-TTAGGTTTCAGACTCGTT-3'        |
|               |           | Promoter-CBF3 II-R  | 5'-TAGATCAATTAGAAGCAT-3'        |
| <i>CBF3</i>   | At4g25480 | Promoter-CBF3 III-F | 5'-GAGAATTTTAATTAGCAGTC-3'      |
|               |           | Promoter-CBF3 III-R | 5'-GAAATATGGTATTTTGA-3'         |
| <i>CBF3</i>   | At4g25480 | Promoter-CBF3 IV-F  | 5'-ACATGGCAGATCTTAATG-3'        |

Promoter-CBF3 IV-R 5'-TTAGAGGCAAAAGAAAAG-3'



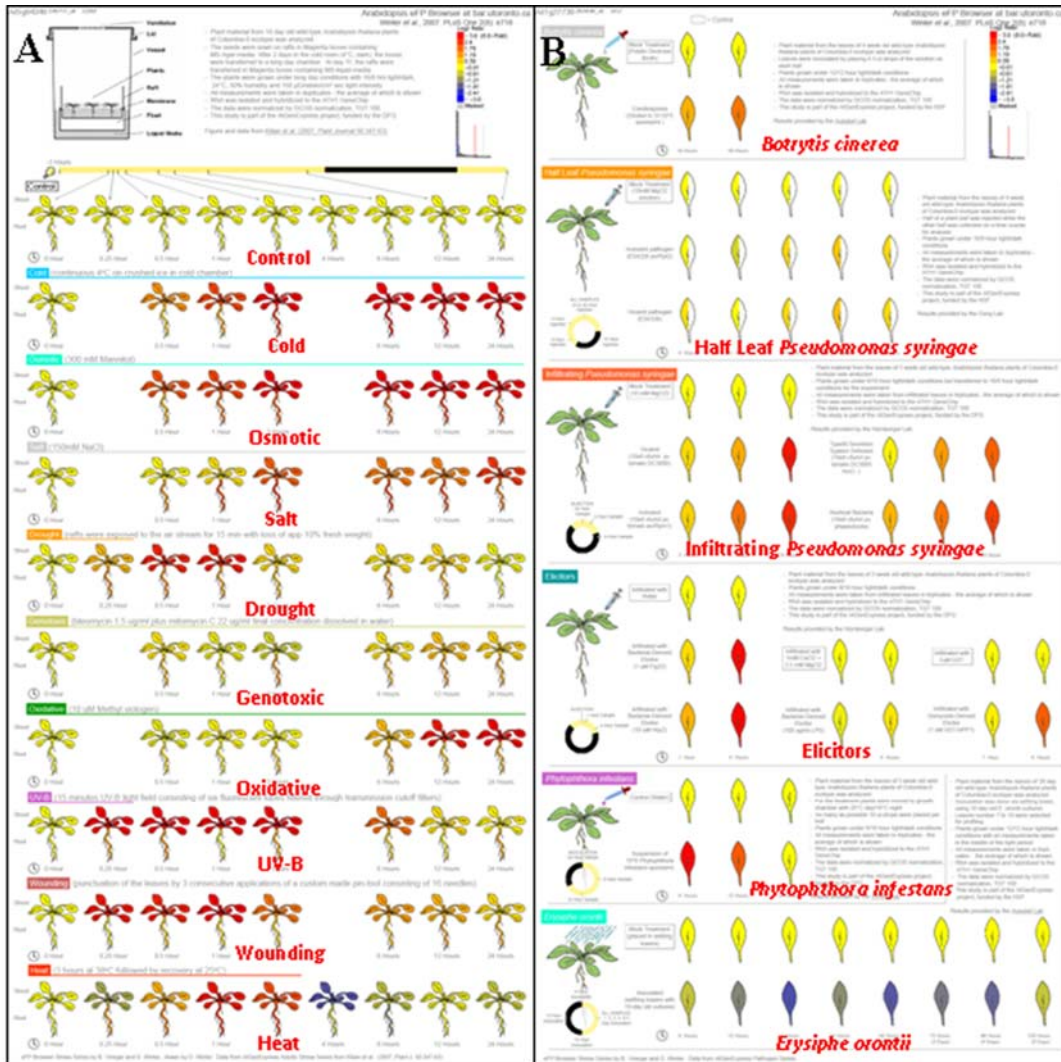

**Fig. S1.** Expression level changes of *AtZAT6* under abiotic and biotic stress conditions. Arabidopsis eFP Browser (<http://bar.utoronto.ca/efp/cgi-bin/efpWeb.cgi>) was used for characterization of *AtZAT6* gene expression.

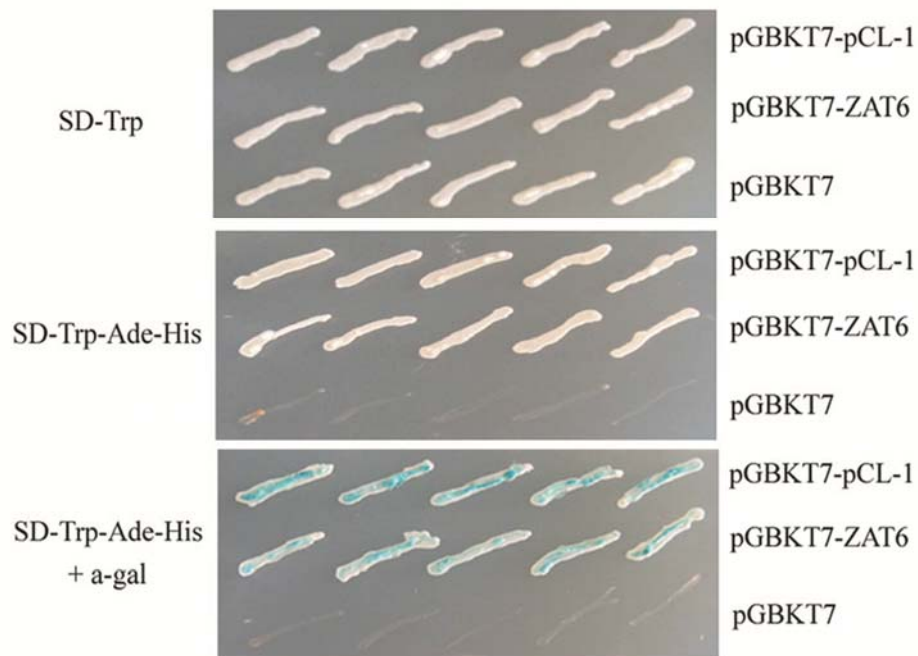

**Fig. S2.** Transactivation activity of AtZAT6 in yeast. The plasmids of AtZAT6-pGBKT7, pCL-1-pGBKT7, pGBKT7 were transformed into the yeast strain AH109, and the transformants were then plated on selective SD medium [SD medium lacking Trp, SD medium lacking Trp, Ade and His with 10 mM 3-amino-1,2,4-triazole (3-AT)] and grown for 2 d at 30 ° C. The pCL-1-pGBKT7 and the empty vector pGBKT7 were used as positive and negative controls, respectively.

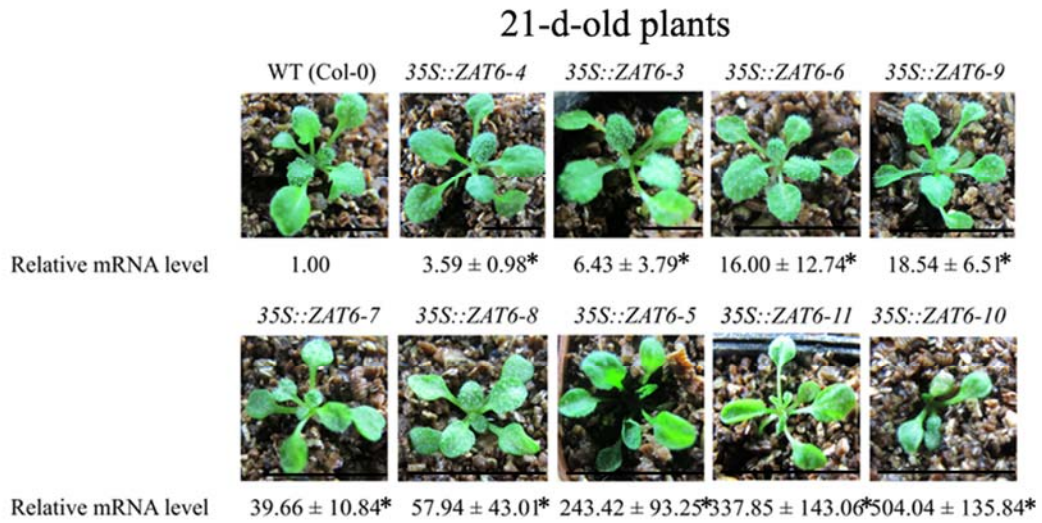

**Fig. S3.** Phenotypes of 21-d-old WT and *AtZAT6* overexpressing T<sub>1</sub> generation plants. Top, 21-d-old WT and *AtZAT6* overexpressing T<sub>1</sub> generation plants in soil. Bars = 1 cm. Bottom, the relative mRNA level of *AtZAT6* of the above plants. The expression level of *AtZAT6* in WT was normalized as 1.0. Means ± SDs of three independent experiments are shown in the results, and asterisk symbols (\*) indicates the significant difference of  $p < 0.05$  compared to WT.

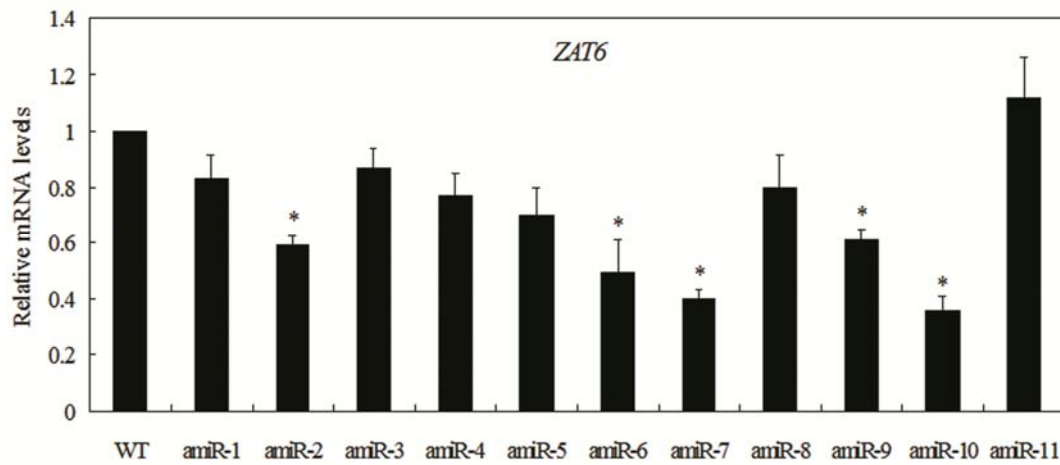

**Fig. S4.** The expression level of *AtZAT6* in *AtZAT6* knockdown plants. The expression level of *AtZAT6* in WT was normalized as 1.0. Means  $\pm$  SDs of three independent experiments are shown in the results, and asterisk symbols (\*) indicates the significant difference of  $p < 0.05$  compared to WT.

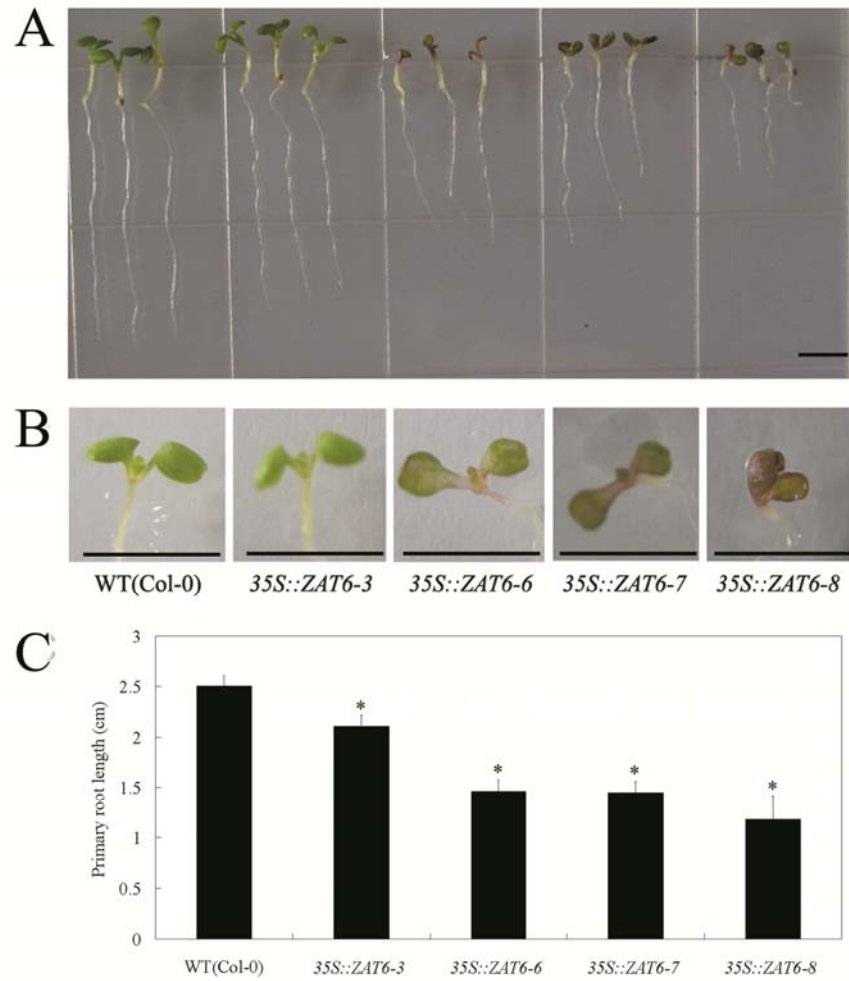

**Fig. S5.** Phenotypes of 7-d-old WT and *AtZAT6* overexpressing plants on MS plate. (A)(B) 7-d-old WT and *AtZAT6* overexpressing plants on MS plate. Bars = 0.5 cm. (C) Primary root length of 7-d-old WT and *AtZAT6* overexpressing plants on MS plate. Means  $\pm$  SDs (n = 30) are shown in the results, and asterisk symbols (\*) indicates the significant difference of  $p < 0.05$  compared to WT.

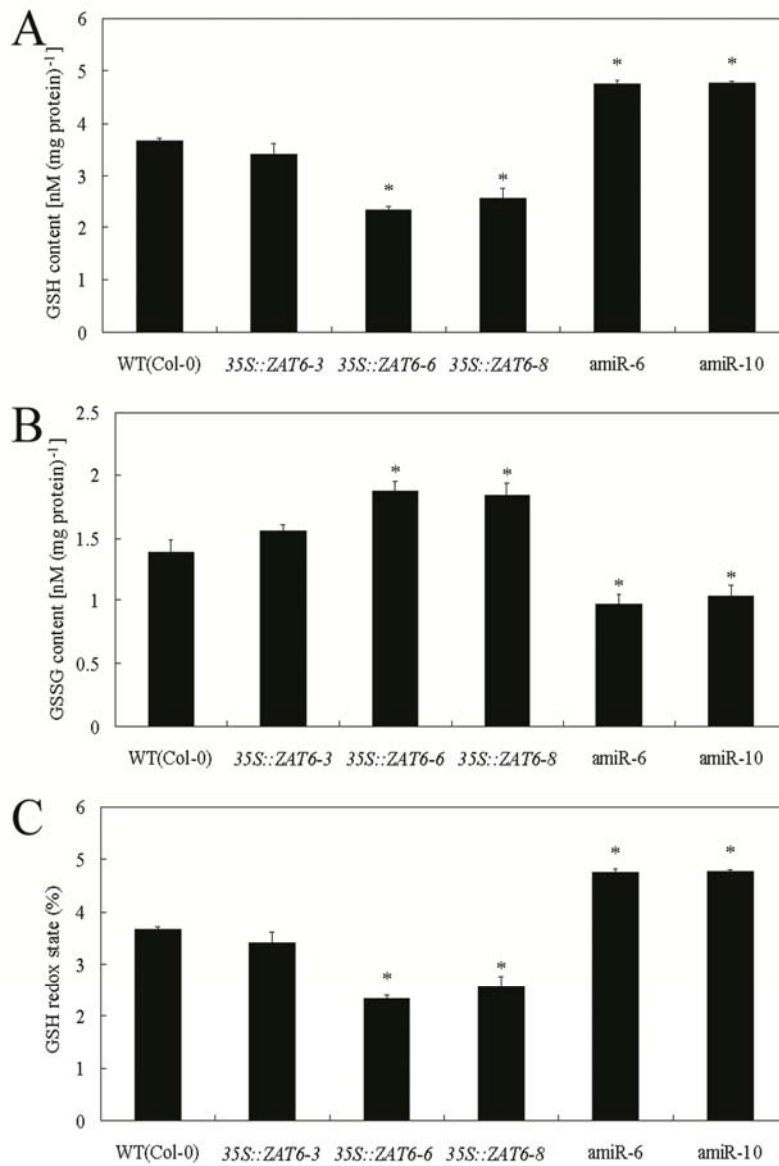

**Fig. S6.** Modulation of AtZAT6 expression affects glutathione pool and redox state. (A)-(C) Quantifications of GSH (A), GSSG (B) and GSH redox state (C). Means  $\pm$  SDs of three independent experiments are shown in the results, and asterisk symbols (\*) indicates the significant difference of  $p < 0.05$  compared to WT.

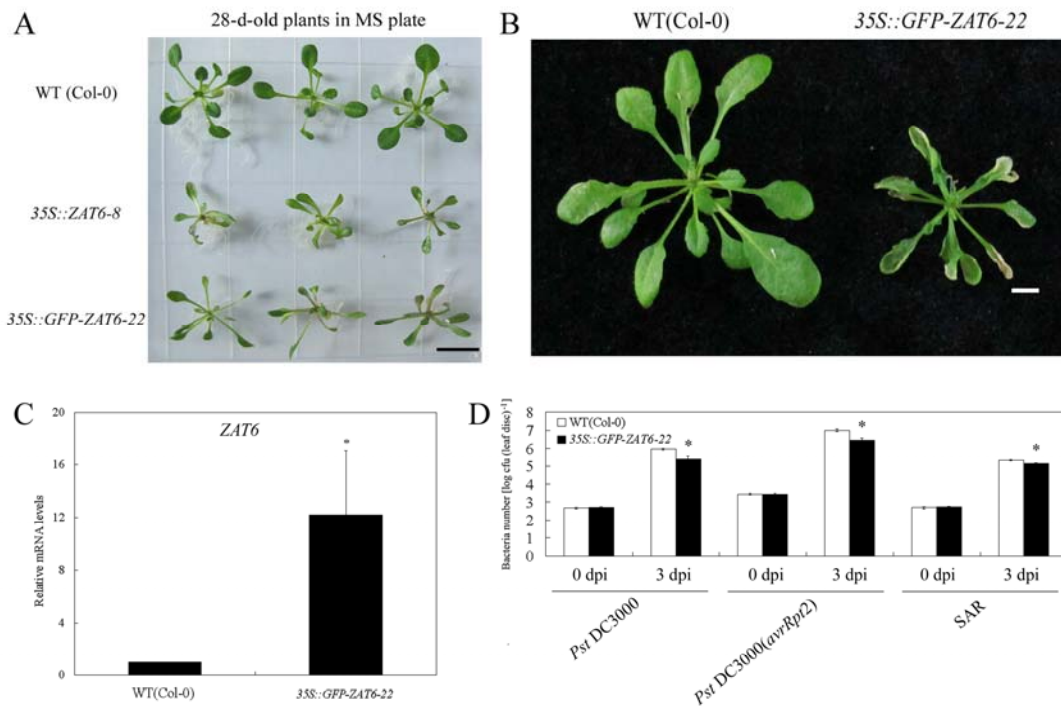

**Fig. S7.** Phenotype of *35S::GFP-ZAT6* transgenic plants. (A)(B) 28-d-old of WT and *35S::GFP-ZAT6* transgenic plants in MS plate (A) and in soil (B). Bars = 1 cm. (C) *AtZAT6* expression levels in WT and *35S::GFP-ZAT6* transgenic plants by real-time PCR. The expression level of *AtZAT6* in WT was normalized as 1.0. (D) Growth of *Pst* DC3000 and *Pst* DC3000(*avrRpt2*) on WT and *35S::GFP-ZAT6* transgenic plants at 0 and 3 dpi of bacterial infection, respectively. Means  $\pm$  SDs of three independent experiments are shown in the results, and asterisk symbols (\*) indicates the significant difference of  $p < 0.05$  compared to WT.
